# Supplementary material for: An atlas of neural crest lineages along the posterior developing zebrafish at single-cell resolution
Source: PubMed Central journal article supplement (PMC7886338; doi:10.7554/elife.60005), 2021-02-16
Supplement: elife-60005-fig1-data2.pdf [file elife-60005-fig1-data2.pdf]

| Time Point | Cluster ID # | Major Cell Type       |                                              | Subtype | Identifier genes                                                                              | # of Cells in Cluster | Citations                                                                                                          |
|------------|--------------|-----------------------|----------------------------------------------|---------|-----------------------------------------------------------------------------------------------|-----------------------|--------------------------------------------------------------------------------------------------------------------|
| 48-50HPF   | cl0          | Neuronal              | Autonomic Neuronal Progenitor                |         | <b>phox2bb, tfap2a/b, elavl3/4, phox2a, tuba2, ncam1a, draxin, snca, fez1, cdh2</b>           | 201                   | Farnsworth et al., 2020; Soldatov et al., 2019                                                                     |
| 48-50HPF   | cl1          | Mesenchyme            | Mesenchymal Progenitor                       |         | <b>prrx1a, snai1a, twist1a, foxc1b, mcm5, pcna, mcm7, cdh11, meox1</b>                        | 160                   | Soldatov et al., 2019                                                                                              |
| 48-50HPF   | cl2          | Mesenchyme            | Chondrogenic Mesenchyme Proliferative 1      |         | <b>dlx2a, prrx1a/b, twist1a/b, barx1, cdk1, ccna2</b>                                         | 154                   | Soldatov et al., 2019; Sperber et al., 2008; Sperber and Dawid, 2008; Ding et al., 2013; Barske et al., 2016       |
| 48-50HPF   | cl3          | Mesenchyme            | Chondrogenic Mesenchyme Proliferative 2      |         | <b>barx1, dlx2a, mcm6, prrx1b, chaf1a, pcna, hand2</b>                                        | 129                   | Soldatov et al., 2019; Sperber et al., 2008; Sperber and Dawid, 2008; Ding et al., 2013; Barske et al., 2016       |
| 48-50HPF   | cl4          | Mesenchyme            | Chondrogenic Mesenchyme Stem-like            |         | <b>prrx1a, dlx2a, barx1, twist1a, rpa1, fen1, rpa2, uhrf1, id3, chaf1a</b>                    | 108                   | Soldatov et al., 2019; Sperber et al., 2008; Sperber and Dawid, 2008; Ding et al., 2013; Barske et al., 2016       |
| 48-50HPF   | cl5          | Neural Crest          | Migratory Neural Crest/ Enteric Neural Crest |         | <b>sox10, foxd3, crestin, tfap2a, mmp17b, pcdh10a, phox2bb, ret, ngrfr, gfra1a,</b>           | 93                    | Dutton et al., 2001; Luo et al., 2001; Knight et al., 2003; Stewart et al., 2006                                   |
| 48-50HPF   | cl6          | Mesenchyme            | Mesenchyme Differentiating 1                 |         | <b>foxc1a, twist1a, tagln2, aldh1a2, rdh10a, meis3, cyp26a1, hand2, tpm4a, actb1</b>          | 88                    | Soldatov et al., 2019                                                                                              |
| 48-50HPF   | cl7          | Neuronal              | Central Nervous System neuron                |         | <b>gad1b, gad2, slc6a5, slc32a1, gata2a, irx1b, elavl3, elavl4, tuba2, phox2bb</b>            | 86                    | Farnsworth et al. 2020                                                                                             |
| 48-50HPF   | cl8          | Pigment               | Melanophore                                  |         | <b>tyrp1a/b, mitfa, dct, pmela, slc45a2, sox10, mlpha, tspan10, oca2</b>                      | 81                    | Du et al., 2003; Lister et al., 1999; Ludwig et al., 2004; Quigley and Parichy, 2002                               |
| 48-50HPF   | cl9          | Mesenchyme            | Chondrogenic Mesenchyme Migratory            |         | <b>dlx2a, barx1, foxc1a, twist1a, dx4a, id2a, snai1a/b, twist3</b>                            | 77                    | Soldatov et al., 2019; Sperber et al., 2008; Sperber and Dawid, 2008; Ding et al., 2013; Barske et al., 2016       |
| 48-50HPF   | cl10         | Mesenchyme            | Mesenchyme Differentiating 2                 |         | <b>cdh11, foxc1a/b, prrx1a, meox1, pdgfra, col2a1a, col9a1a, col9a2, sparc, colec12, reck</b> | 74                    | Soldatov et al., 2019                                                                                              |
| 48-50HPF   | cl11         | Mesenchyme            | Mesenchymal Migratory                        |         | <b>cxcl12a, cxcl12b, rac1, reck, foxc1a, twist1a, prrx1a, meox1, sna2</b>                     | 74                    | Soldatov et al., 2019                                                                                              |
| 48-50HPF   | cl12         | Mesenchyme            | Chondrogenic Mesenchyme Proliferative 3      |         | <b>prrx1b, twist1b, foxc1a, barx1, cyp26a1, rdh10a, meis3, aldh1a2, mcm5, mcm6</b>            | 61                    | Soldatov et al., 2019                                                                                              |
| 48-50HPF   | cl13         | Neural                | Neural Progenitor                            |         | <b>notch1a, dla/b, olig4, elavl3, phox2ba, neurod4, scrt2, phox2bb, ncam1a</b>                | 61                    | Farnsworth et al., 2020                                                                                            |
| 48-50HPF   | cl14         | Mesenchyme            | Fin Bud                                      |         | <b>tbx5a, hand2, hoxa13a/b, prrx1a/b, foxc1b, hoxd13a, pcna</b>                               | 58                    | Yelon et al., 2000; Lu et al., 2019; Nakamura et al., 2016; Feregrino et al., 2019                                 |
| 48-50HPF   | cl15         | Glial                 | Peripheral Glial Progenitor                  |         | <b>sox10, olig1/2, fabp7a, notch1a, sox3, nkx2.2a, pou3f1, plp1a, gfap, s100b</b>             | 44                    | Soldatov et al., 2019; Carney et al. 2006                                                                          |
| 48-50HPF   | cl16         | Otic                  | Otic Epithelium                              |         | <b>sox10, cdh11, otomp, cldnb, cldn7b, cldnh, epcam, aldh1a3, vamp8</b>                       | 23                    | Thisse et al., 2004; Thisse et al., 2005                                                                           |
| 48-50HPF   | cl17         | Neuronal              | Sensory Neuronal Progenitor                  |         | <b>ngfrb, neurod1, neurod4, vim, neurog1, grfra1a, six1a/b, elavl4, isl2a/b, pou4f1</b>       | 23                    | Soldatov et al., 2019                                                                                              |
| 48-50HPF   | cl18         | Muscle                | Muscle                                       |         | <b>ckmb, actc1b, tnn2, tnnt3a, pvalb2, tnnt3b, ak1, tpma, desma</b>                           | 13                    | Thisse et al., 2004                                                                                                |
| 68-70HPF   | cl0          | Mesenchyme            | Chondrogenic Differentiating Mesenchyme 1    |         | <b>barx1, sparc, prrx1a/b, twist1a/b, pdgfra, col1a2, col6a1, col5a1</b>                      | 281                   | Soldatov et al., 2019; Sperber et al., 2008; Sperber and Dawid, 2008; Ding et al., 2013; Barske et al., 2016       |
| 68-70HPF   | cl1          | Mesenchyme            | Fin Bud                                      |         | <b>tbx5a, hand2, prrx1a/b, hoxd13a, pcna, foxc1a/b, meox1, hoxa13a/b</b>                      | 254                   | Yelon et al., 2000; Lu et al., 2019; Nakamura et al., 2016; Feregrino et al., 2019                                 |
| 68-70HPF   | cl2          | Mesenchyme            | Mesenchymal Migratory                        |         | <b>meox1, prrx1a/b, foxc1b, snai1a, cdh11, rac1a, myl9b, twist1a/b</b>                        | 229                   | Soldatov et al., 2019                                                                                              |
| 68-70HPF   | cl3          | Neural                | Neural Progenitor                            |         | <b>fabp7a, foxd3, sox10, phox2bb, her4.2, mdka, her4.1, ccnd2a, ngrfr, tuba8l3</b>            | 228                   | Farnsworth et al. 2020                                                                                             |
| 68-70HPF   | cl4          | Pigment               | Melanophore                                  |         | <b>mitfa, pmela, tyrp1a/b, dct, oca2, mlpha, tspan10, tfap2e</b>                              | 213                   | Du et al., 2003; Lister et al., 1999; Ludwig et al., 2004; Quigley and Parichy, 2002                               |
| 68-70HPF   | cl5          | Neuronal              | Sympatho-enteric Progenitor                  |         | <b>ascl1a, phox2bb, phox2a, hand2, insm1a/b, dpysl3, ret, ngrfr, gfra1a, elavl3/4</b>         | 202                   | Thisse et al., 2004; Heanue and Pachnis, 2008                                                                      |
| 68-70HPF   | cl6          | Mesenchyme            | Chondrogenic Differentiating Mesenchyme 2    |         | <b>barx1, prrx1a, foxc1a/b, twist1a, col1a2, col5a1, cdh11, dx5a, sparc, meox1</b>            | 191                   | Soldatov et al., 2019                                                                                              |
| 68-70HPF   | cl7          | Mesenchyme            | Fin Bud                                      |         | <b>tbx5a, hand2, hoxa13a/b, prrx1a/b, hoxd13a, pcna, sox10</b>                                | 178                   | Yelon et al., 2000; Lu et al., 2019; Nakamura et al., 2016; Feregrino et al., 2019                                 |
| 68-70HPF   | cl8          | Mesenchyme            | Chondrogenic Proliferative Mesenchyme        |         | <b>prrx1a/b, foxc1a, twist1a/b, barx1, col2a1a, pcna, cdc6, ccnb2</b>                         | 98                    | Soldatov et al., 2019                                                                                              |
| 68-70HPF   | cl9          | Muscle                | Pigmented Muscle                             |         | <b>tnnt3b, mitfa, tyrp1a, tpma, ckmb, gch2, dct, tnn2, myl1,</b>                              | 93                    | Thisse et al., 2004; Thisse et al., 2005                                                                           |
| 68-70HPF   | cl10         | Neural                | Neural Progenitor                            |         | <b>sox10, foxd3, ascl1a, aurkb, ncam1b, ccna2, tpx2, phox2bb, ret, elavl3/4</b>               | 76                    | Farnsworth et al. 2020                                                                                             |
| 68-70HPF   | cl11         | Otic                  | Otic Epithelium                              |         | <b>cidne, vamp8, cldnb, epcam, cldn7b, cldnh, cdh1</b>                                        | 70                    | Thisse et al., 2004, Thisse et al., 2001                                                                           |
| 68-70HPF   | cl12         | Neuronal              | Enteric Neuron                               |         | <b>elavl3/4, phox2bb, gfra1a, ret, fgf13b, vip, vipb, nos1, ngrfr, hoxb5b</b>                 | 44                    | Shepherd et al., 2004; Heanue and Pachnis, 2008; Uyttebroek et al., 2010; Taylor et al., 2016; Gaudet et al., 2011 |
| 68-70HPF   | cl13         | Pigment               | Pigment Progenitor                           |         | <b>sox10, tfec, tfap2e, mitfa, zeb2a, cdh11, mlpha, pax3a, trpm1b, gpx3</b>                   | 43                    | Saunders et al., 2019                                                                                              |
| 68-70HPF   | cl14         | Glial                 | Schwann Cells                                |         | <b>sox10, mbpa/b, pou3f1, egr2b, fabp7a, erbb3a, plp1a, cx27.5, gldn, mag</b>                 | 42                    | Farnsworth et al. 2020                                                                                             |
| 68-70HPF   | cl15         | Pigment               | Xanthophore                                  |         | <b>xdh, pax7a/b, gch2, aox5</b>                                                               | 39                    | Nord et al., 2016; Parichy et al., 2000; Saunders et al., 2019; Minchin and Hughes, 2008; Lister et al., 1999      |
| 68-70HPF   | cl16         | Pigment               | Iridiophore                                  |         | <b>atic, gpnmb, tfec, pnp4a</b>                                                               | 32                    | Higdon et al., 2013; Lister et al., 2011; Petratou et al., 2018, 2019                                              |
| 68-70HPF   | cl17         | Mesenchyme            | Differentiating Mesenchyme 1                 |         | <b>twist1a, prrx1a, colec12, sparc, mmp2, msx2b, col5a1, col1a1a, pdgfra, tnc</b>             | 25                    | Soldatov et al., 2019                                                                                              |
| 68-70HPF   | cl18         | Pigment               | Proliferative Melanophores                   |         | <b>mitfa, pmela, tyrp1a/b, aurkb, pcna, cenph, mlpha, dct, gpr143, tfap2e</b>                 | 19                    | Du et al., 2003; Lister et al., 1999; Ludwig et al., 2004; Quigley and Parichy, 2002                               |
| 68-70HPF   | cl19         | Muscle                | Muscle                                       |         | <b>ckmb, tpma, tnn2, tnnt3b, actc1b, cavin4a, myom1a, neb, flnca, desma,</b>                  | 18                    | Thisse et al., 2004                                                                                                |
| 68-70HPF   | cl20         | Mesenchyme            | Chondrogenic Mesenchyme Migratory            |         | <b>barx1, twist1a, foxc1a/b, snai1a, dx3b, mmp2, sparc, sna2, dlx2a, sox9a</b>                | 16                    | Soldatov et al., 2019                                                                                              |
| 68-70HPF   | cl21         | Unidentified/Spurious | Unidentified/Spurious                        |         | <b>anxa2b, cldnc, faah2b, vil1, fabp1b.1, plac8.1</b>                                         | 13                    |                                                                                                                    |
| 68-70HPF   | cl22         | Mesenchyme            | Differentiating Mesenchyme 2                 |         | <b>rac2, sparc, col18a1, col2a1b, col1a1a, lama5, thy1</b>                                    | 6                     | Soldatov et al., 2019                                                                                              |
